# Supplementary material for: Physical and functional measures predicting long-term mortality in community-dwelling older adults: a comparative evaluation in the Singapore Longitudinal Ageing Study
Source: publisher site journal article supplement (doi:10.18632/aging.203756), 2021-12-11
Supplement: Supplementary file [file aging-v13i23-203756-supplementary-material-SD1.pdf]

## SUPPLEMENTARY TABLES

**Supplementary Table 1. Sex- and age-stratified analyses of hazard ratios of association with mortality for physical and functional performance measures simultaneously present in the same model.**

| Measure                  |                      | Men  |              |     | Women |              |    | Age < 75 |              |     | Age ≥ 75 |              |   |
|--------------------------|----------------------|------|--------------|-----|-------|--------------|----|----------|--------------|-----|----------|--------------|---|
|                          |                      | HR   | 95% CI       | P   | HR    | 95% CI       | P  | HR       | 95% CI       | P   | HR       | 95% CI       | P |
| Standard deviation score |                      |      |              |     |       |              |    |          |              |     |          |              |   |
| TUG                      | Per SD increase      | 1.77 | (1.15, 2.73) | **  | 2.35  | (1.31, 4.22) | ** | 1.96     | (1.26, 3.06) | **  | 1.85     | (1.07, 3.19) | * |
| GV (Reversed)            | Per SD increase      | 0.76 | (0.54, 1.09) |     | 1.26  | (0.76, 2.08) |    | 0.78     | (0.55, 1.13) |     | 1.34     | (0.83, 2.17) |   |
| KES                      | Per SD increase      | 1.39 | (1.02, 1.91) | *   | 1.02  | (0.67, 1.55) |    | 0.80     | (0.60, 1.06) |     | 1.18     | (0.80, 1.73) |   |
| POMA                     | Per SD increase      | 0.76 | (0.49, 1.17) |     | 0.96  | (0.60, 1.55) |    | 0.82     | (0.50, 1.36) |     | 0.89     | (0.57, 1.38) |   |
| MMSE (Reversed)          | Per SD increase      | 1.12 | (0.78, 1.60) |     | 1.51  | (1.00, 2.26) | *  | 0.87     | (0.58, 1.31) |     | 1.20     | (0.84, 1.71) |   |
| GDS                      | Per SD increase      | 0.87 | (0.60, 1.28) |     | 1.23  | (0.78, 1.92) |    | 1.03     | (0.68, 1.55) |     | 1.13     | (0.74, 1.71) |   |
| Frailty Index            | Per SD increase      | 1.20 | (0.85, 1.69) |     | 1.20  | (0.78, 1.86) |    | 1.27     | (0.88, 1.82) |     | 0.94     | (0.64, 1.39) |   |
| Physical frailty         | Per point increase   | 0.91 | (0.69, 1.19) |     | 1.34  | (0.96, 1.85) |    | 1.07     | (0.78, 1.47) |     | 1.12     | (0.86, 1.46) |   |
| Binary score             |                      |      |              |     |       |              |    |          |              |     |          |              |   |
| TUG                      | ≥9 vs. <9 s          | 3.35 | (1.90, 5.90) | *** | 1.59  | (0.74, 3.44) |    | 2.77     | (1.55, 4.95) | *** | 1.41     | (0.68, 2.92) |   |
| GV                       | <1.0 m/s             | 0.83 | (0.45, 1.52) |     | 0.56  | (0.26, 1.22) |    | 1.04     | (0.52, 2.10) |     | 0.77     | (0.40, 1.48) |   |
| KES                      | 15 kg (M), 11 kg (F) | 2.22 | (1.35, 3.66) | **  | 1.14  | (0.58, 2.22) |    | 1.49     | (0.86, 2.56) |     | 2.12     | (1.17, 3.84) | * |
| POMA                     | 24/25                | 0.95 | (0.45, 2.01) |     | 1.43  | (0.66, 3.09) |    | 1.06     | (0.46, 2.41) |     | 1.20     | (0.58, 2.45) |   |
| MMSE                     | ≤23 vs. ≥24          | 1.13 | (0.46, 2.77) |     | 0.46  | (0.23, 4.51) |    | 0.97     | (0.40, 2.37) |     | 0.92     | (0.47, 1.79) |   |
| GDS                      | ≥5 vs. <5            | 0.73 | (0.22, 2.43) |     | 0.84  | (0.19, 3.62) |    | 0.67     | (0.16, 2.83) |     | 1.15     | (0.34, 3.89) |   |
| Frailty Index            | ≥0.15 vs. <0.15      | 1.85 | (1.03, 3.33) | *   | 2.13  | (1.01, 4.51) | *  | 2.42     | (1.30, 4.50) | **  | 1.00     | (0.52, 1.93) |   |
| Physical frailty         | 3–5 vs. 0–2          | 0.41 | (0.13, 1.24) |     | 1.18  | (0.47, 2.94) |    | 0.85     | (0.28, 2.63) |     | 0.62     | (0.26, 1.47) |   |

Abbreviation: HR: hazard ratio; \* $p < 0.05$ ; \*\* $p < 0.01$ ; \*\*\* $p < 0.001$ . All physical and functional performance measure was included in the same model together. Binary cut-offs shown are commonly used in previous research and clinical applications.

**Supplementary Table 2. Sex- and age-stratified analyses of area under curve for physical and functional performance measures predicting mortality.**

| Measure          | Men   |       |       |     | Women |       |       |     | Age < 75 |       |       |     | Age ≥ 75 |       |       |    |
|------------------|-------|-------|-------|-----|-------|-------|-------|-----|----------|-------|-------|-----|----------|-------|-------|----|
|                  | AUC   | 95%   | CI    | P   | AUC   | 95%   | CI    | P   | AUC      | 95%   | CI    | P   | AUC      | 95%   | CI    | P  |
| TUG              | 0.737 | 0.684 | 0.790 | *** | 0.741 | 0.662 | 0.820 | *** | 0.712    | 0.649 | 0.775 | *** | 0.619    | 0.542 | 0.696 | ** |
| GV (Reversed)    | 0.684 | 0.627 | 0.741 | *** | 0.678 | 0.593 | 0.763 | *** | 0.645    | 0.580 | 0.710 | *** | 0.554    | 0.468 | 0.640 |    |
| KES              | 0.648 | 0.581 | 0.715 | *** | 0.634 | 0.557 | 0.711 | **  | 0.520    | 0.448 | 0.591 |     | 0.544    | 0.466 | 0.621 |    |
| POMA             | 0.550 | 0.495 | 0.605 |     | 0.577 | 0.501 | 0.652 | *   | 0.531    | 0.476 | 0.586 |     | 0.540    | 0.468 | 0.612 |    |
| MMSE (Reversed)  | 0.618 | 0.553 | 0.683 | *** | 0.699 | 0.617 | 0.781 | *** | 0.575    | 0.508 | 0.643 | *   | 0.572    | 0.488 | 0.655 |    |
| GDS              | 0.550 | 0.488 | 0.613 |     | 0.625 | 0.540 | 0.710 | **  | 0.559    | 0.489 | 0.629 |     | 0.553    | 0.476 | 0.629 |    |
| Frailty Index    | 0.611 | 0.536 | 0.685 | **  | 0.664 | 0.566 | 0.762 | **  | 0.576    | 0.491 | 0.661 |     | 0.548    | 0.456 | 0.640 |    |
| Physical frailty | 0.579 | 0.514 | 0.644 | *   | 0.677 | 0.594 | 0.759 | *** | 0.565    | 0.494 | 0.635 |     | 0.580    | 0.506 | 0.654 | *  |
| Age              | 0.696 | 0.634 | 0.759 | **  | 0.750 | 0.669 | 0.832 | *** | 0.650    | 0.579 | 0.721 | **  | 0.555    | 0.470 | 0.640 |    |

Abbreviation: AUC: area under curve; \* $p < 0.05$ ; \*\* $p < 0.01$ ; \*\*\* $p < 0.001$ .

**Supplementary Table 3. List of 98 binary variables used to derive frailty index.**

---

|    |                                                                                   |
|----|-----------------------------------------------------------------------------------|
| 1  | History of hypertension                                                           |
| 2  | History of high cholesterol                                                       |
| 3  | History of diabetes                                                               |
| 4  | History of stroke                                                                 |
| 5  | History of heart attack                                                           |
| 6  | History of atrial fibrillation                                                    |
| 7  | History of heart failure                                                          |
| 8  | History of eye problem                                                            |
| 9  | History of hearing loss                                                           |
| 10 | History of kidney failure                                                         |
| 11 | History of asthma                                                                 |
| 12 | History of COPD                                                                   |
| 13 | History of tuberculosis                                                           |
| 14 | History of arthritis                                                              |
| 15 | History of osteoporosis                                                           |
| 16 | History of hip fracture                                                           |
| 17 | History of neurodegenerative disorders                                            |
| 18 | History of gastrointestinal problem                                               |
| 19 | History of thyroid problem                                                        |
| 20 | History of cancer                                                                 |
| 21 | History of depression                                                             |
| 22 | History of other mental disorders                                                 |
| 23 | History of dementia                                                               |
| 24 | History of Parkinson's disease                                                    |
| 25 | History of other neurological disorder                                            |
| 26 | History of cancer                                                                 |
| 27 | Illness/condition that changes the kind/amount of food eaten                      |
| 28 | Difficulty eating due to tooth/mouth problems                                     |
| 29 | Unintended loss 4.5 kg in last 6 months                                           |
| 30 | Difficulty in falling asleep                                                      |
| 31 | Frequent awakenings and difficulty in going back to sleep                         |
| 32 | Wake up very early and difficulty in going back to sleep                          |
| 33 | Feel tired in daytimes                                                            |
| 34 | Feel excessively sleepy in daytimes                                               |
| 35 | Pain interfere with sleep                                                         |
| 36 | Poor sleep quality                                                                |
| 37 | Informant report of memory decline/mental ability                                 |
| 38 | Less able to manage to find personal belonging at home                            |
| 39 | Less able to manage own finance                                                   |
| 40 | Less able to manage to keep appointment                                           |
| 41 | Less able to read for over 5 minutes at a time                                    |
| 42 | Cognitive impairment (age-education- adjusted MMSE < 23)                          |
| 43 | Poorer memory compared to other of similar age                                    |
| 44 | Poorer memory/mental abilities compared to earlier period                         |
| 45 | Less able to remember things about family and friends (compared to 1 year ago)    |
| 46 | Less able to remember things happened recently (compare to 1 year ago)            |
| 47 | Less able to remember appointment and social arrangement (compared to 1 year ago) |
| 48 | Less able to remember the place where things were put (compared to 1 year ago)    |
| 49 | Less able to find way in getting around neighbourhood (compared with 1 year ago)  |
| 50 | Less able to learn new things (compared to 1 year ago)                            |
| 51 | Less able to make decision on every matter (compared to 1 year ago)               |
| 52 | Less able to follow news and understand what is going on (compared to 1 year ago) |
| 53 | Less able to handling money (compared to 1 year ago)                              |
| 54 | Less able to choose or use the right words (compared to 1 year ago)               |
| 55 | Less able to concentrate (compared to 1 year ago)                                 |

---

|    |                                                                                  |
|----|----------------------------------------------------------------------------------|
| 56 | Health is fair or poor                                                           |
| 57 | Health limited in doing moderate activities during typical day                   |
| 58 | Health limited in climbing stairs during typical day                             |
| 59 | Health limited in accomplishing lesser                                           |
| 60 | Health limited in work/other activities                                          |
| 61 | Accomplish less because of emotional problems                                    |
| 62 | Can't do work or other activities well because of emotional problems             |
| 63 | Pain interfere with normal work                                                  |
| 64 | Not felt calm and peaceful                                                       |
| 65 | Have lots of energy                                                              |
| 66 | Felt downhearted and low                                                         |
| 67 | Physical health/emotional problems interfere with social activities past 4 weeks |
| 68 | Have problem with Mobility                                                       |
| 69 | Have problem with Self-care                                                      |
| 70 | Have problem with Usual activity                                                 |
| 71 | Have Pain or discomfort moderate to extreme                                      |
| 72 | Have moderate to extreme anxiety or depression                                   |
| 73 | Life fairly to very boring                                                       |
| 74 | Life fairly to very sad                                                          |
| 75 | Life fairly to very hard                                                         |
| 76 | Very lonely                                                                      |
| 77 | Depressive symptoms (GDS $\geq$ 5)                                               |
| 78 | Hospitalization in past 1 year                                                   |
| 79 | Polypharmacy ( $\geq$ 5 medication)                                              |
| 80 | Bowel incontinence                                                               |
| 81 | Bladder incontinence                                                             |
| 82 | Dependent on personal grooming                                                   |
| 83 | Dependent on toilet use                                                          |
| 84 | Dependent on feeding                                                             |
| 85 | Dependent on transfer (from bed to chair & back)                                 |
| 86 | Dependent on mobility (about the house)                                          |
| 87 | Dependent on Dressing                                                            |
| 88 | Dependent on stairs climbing                                                     |
| 89 | Dependent on bathing                                                             |
| 90 | FEV1/FVC $<$ 0.70                                                                |
| 91 | Chronic cough                                                                    |
| 92 | Chronic sputum                                                                   |
| 93 | Breathlessness                                                                   |
| 94 | Body mass loss (BMI $<$ 18.5 kg/m <sup>2</sup> )                                 |
| 95 | Slow gait                                                                        |
| 96 | Weakness                                                                         |
| 97 | Exhaustion                                                                       |
| 98 | Low physical activity                                                            |

---
